# Supplementary material for: Genetic Ancestry Inferred From Autosomal and Y Chromosome Markers and HLA&nbsp;Genotypes in Type 1 Diabetes From an Admixed Brazilian Population.
Source: Research Square preprint supplement (doi:10.21203/rs.3.rs-262854/v1), 2021-03-03
Supplement: Supplementary file 2 [file 78cd273cde02f0b2d2d59f47.docx]

**Genetic ancestry inferred from autosomal and Y chromosome markers and HLA genotypes in Type 1 Diabetes from an admixed Brazilian population.**

Rossana Santiago de Sousa Azulay1,2*, Luís Cristóvão Porto3, Dayse Aparecida Silva4, Maria da Gloria Tavares1,2, Roberta Dualibe2, Gilvan Cortês Nascimento1,2, Sabrina Da Silva Pereira Damianse1,2, Viviane Chaves de Carvalho Rocha1,2, Marcelo Magalhães2,5, Vandilson Rodrigues2, Paulo Ricardo Vilas Boas Carvalho3 Manuel dos Santos Faria1,2,5, Marília Brito Gomes6

1Endocrinology Unit, University Hospital of the Federal University of Maranhão (HUUFMA), São Luís, Brazil

2Research Group in Clinical and Molecular Endocrinology and Metabology (ENDOCLIM), São Luís, Brazil

3Histocompatibility and Cryopreservation Laboratory (HLA), Rio de Janeiro State University (UERJ), Rio de Janeiro, Rio de Janeiro, Brazil

4DNA Diagnostic Laboratory (LDD), Rio de Janeiro State University (UERJ), Rio de Janeiro, Rio de Janeiro, Brazil

5Clinical Research Center of the University Hospital of the Federal University of Maranhão (CEPEC – HUUFMA), São Luís, Brazil

6Diabetes Unit, State University of Rio de Janeiro (UERJ), Rio de Janeiro, Brazil

* Corresponding author at: Service of Endocrinology, University Hospital, Federal University of Maranhão (HUUFMA), Rua Barão de Itapary, 227, Centro, 65020-070, São Luís, Maranhão, Brazil. *E-mail address*: rossanaendocrino@gmail.com

**Table 1S. Color/race of family members informed of the Maranhão state T1D and control participants.**

| **Variable** | **T1D**  **(n=152)** | **Control**  **(n=286)** | ***P* value** |
| --- | --- | --- | --- |
| **n (%)** | **n (%)** |
| Reported color-race |  |  |  |
| Father |  |  | 0.086 |
| White | 42 (27.6) | 84 (29.4) |  |
| Black | 18 (11.8) | 57 (19.9) |  |
| Brown* | 85 (55.9) | 135 (47.2) |  |
| Asian* | 0 (0.0) | 1 (0.3) |  |
| Indigenous | 1 (0.7) | 5 (1.8) |  |
| Unknown | 6 (3.9) | 4 (1.4) |  |
| **Mother** |  |  | **0.010** |
| White | 44 (28.9) | 98 (34.3) |  |
| Black | 13 (8.6) | 45 (15.7) |  |
| Brown* | 94 (61.8) | 131 (45.8) |  |
| Asian* | 0 (0.0) | 4 (1.4) |  |
| Indigenous | 0 (0.0) | 6 (2.1) |  |
| Unknown | 1 (0.7) | 2 (0.7) |  |
| Maternal grandfather |  |  | 0.183 |
| White | 45 (29.6) | 77 (27.0) |  |
| Black | 19 (12.5) | 60 (21.1) |  |
| Brown* | 70 (46.1) | 105 (36.8) |  |
| Asian* | 0 (0.0) | 1 (0.3) |  |
| Indigenous | 1 (0.7) | 3 (1.1) |  |
| Unknown | 17 (11.2) | 39 (13.7) |  |
| Maternal grandmother |  |  | 0.609 |
| White | 61 (40.1) | 108 (37.8) |  |
| Black | 15 (9.9) | 37 (12.9) |  |
| Brown* | 60 (39.5) | 107 (37.4) |  |
| Asian* | 0 (0.0) | 2 (0.7) |  |
| Indigenous | 2 (1.3) | 9 (3.2) |  |
| Unknown | 14 (9.2) | 23 (8.0) |  |
| Paternal grandfather |  |  | 0.824 |
| White | 43 (28.3) | 80 (28.0) |  |
| Black | 21 (13.8) | 51 (17.8) |  |
| Brown* | 48 (31.6) | 87 (30.4) |  |
| Asian* | 0 (0.0) | 1 (0.3) |  |
| Indigenous | 1 (0.7) | 3 (1.1) |  |
| Unknown | 39 (25.7) | 64 (22.4) |  |
| Paternal grandmother |  |  | 0.192 |
| White | 55 (36.2) | 94 (32.9) |  |
| Black | 13 (8.6) | 44 (15.4) |  |
| Brown* | 54 (35.5) | 91 (31.8) |  |
| Asian* | 0 (0.0) | 2 (0.7) |  |
| Indigenous | 1 (0.7) | 7 (2.4) |  |
| Unknown | 29 (19.1) | 48 (16.8) |  |
| Data are presented as number (percentage). T1D = type 1 diabetes. Bold indicates statistical significance (*P* < .05). | | | |


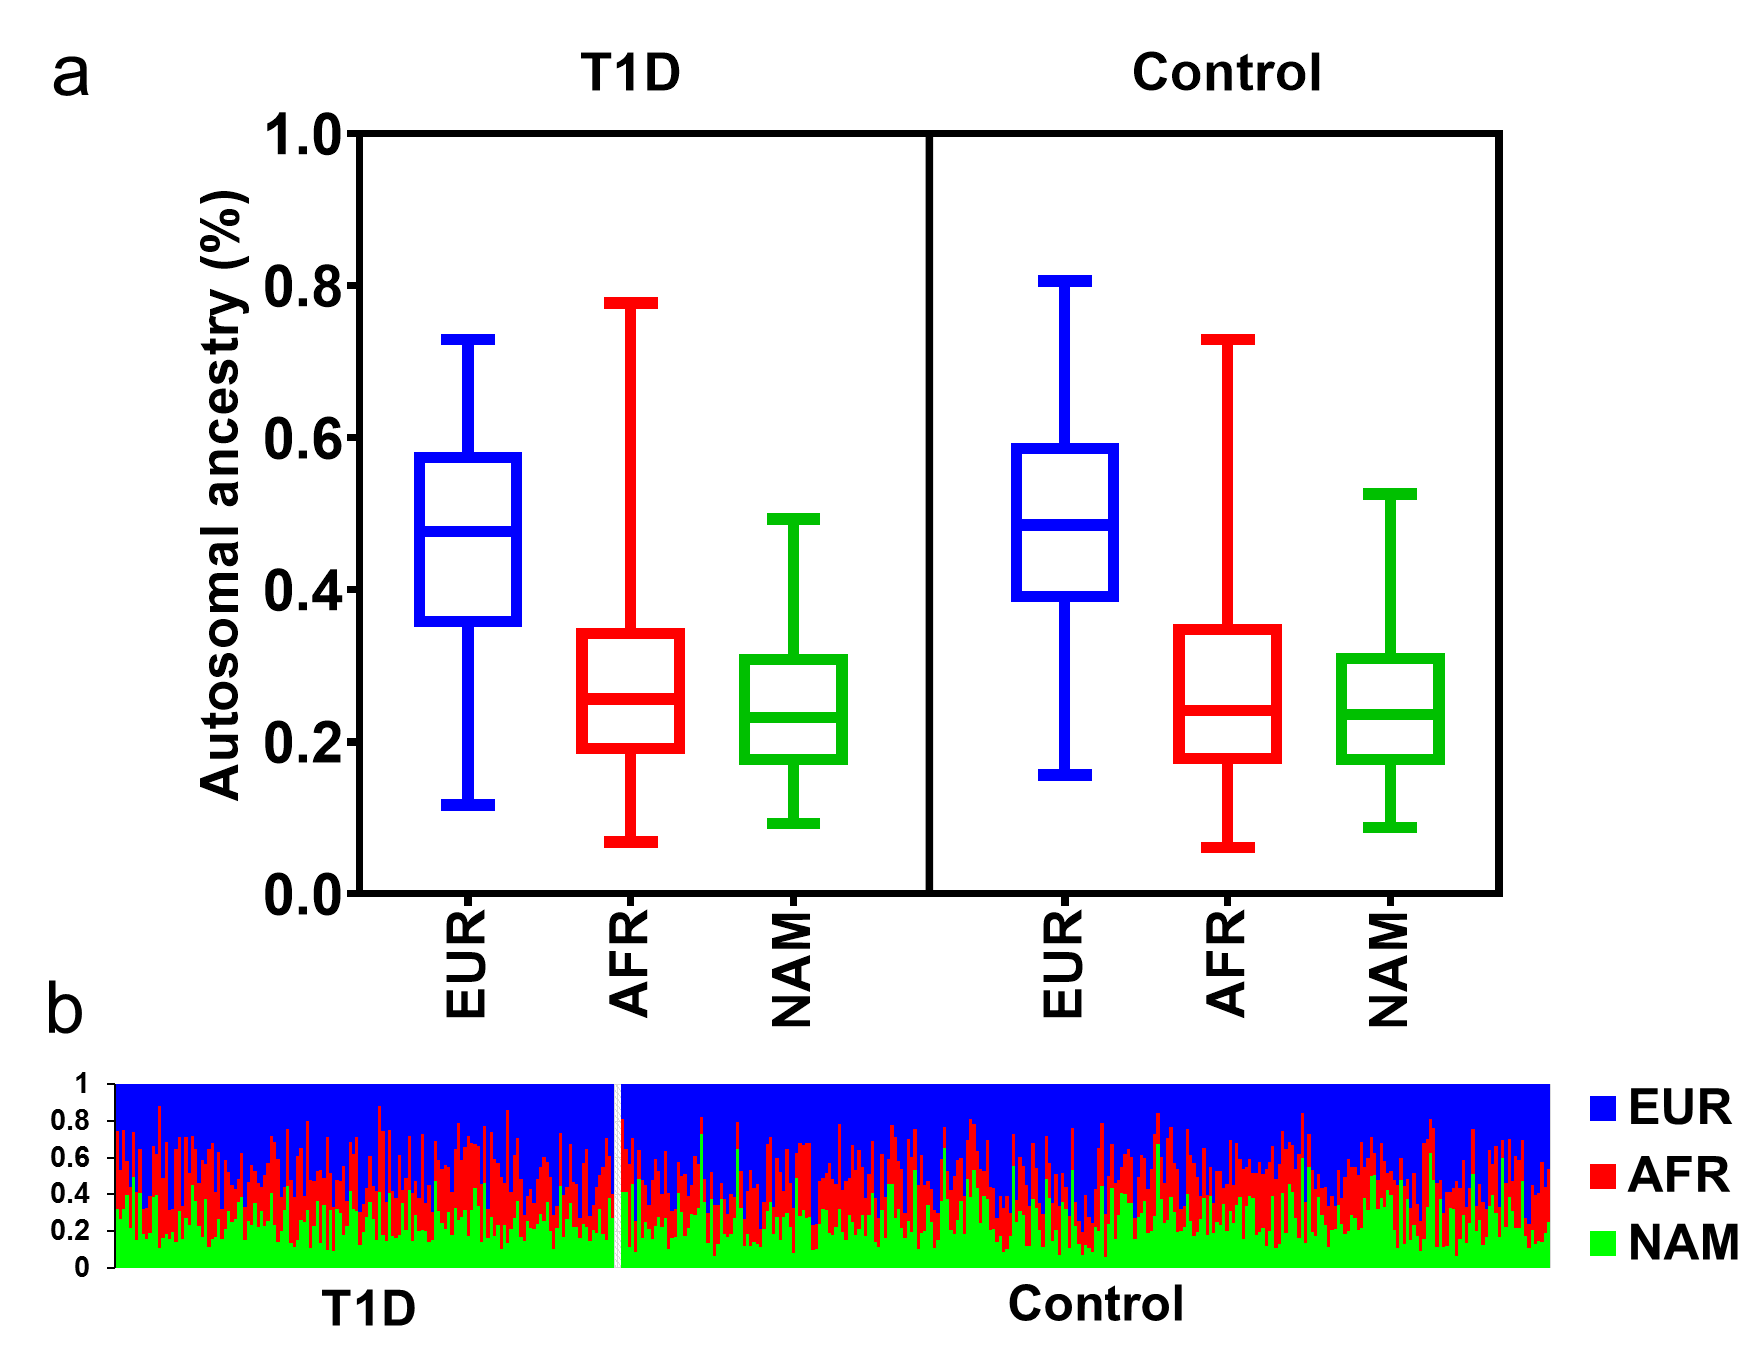


**Figure 1S. Box plot (a) and individual (b) proportions of the ancestry estimates for the patients with T1D and control group, using 46 AIM-Indel.** EUR = European. AFR =- African. NAM = Native American. Ancestry estimates were obtained using STRUCTURE, for the following options: k = 3; 50 000 burning steps, followed by 50 000 Markov Chain Monte Carlo iterations; Admixture model (Use population Information to test for migrants); and allele frequencies were correlated and updated using only individuals with POPFLAG = 1.

**Figure 2S. Box-plot representing autosomal ancestry within self-reported color-race groups in patients with T1D (a) and control group (b).** EUR = European. AFR = African. NAM = Native American.

**Table 2S. Most frequent (> 5% of frequency) *HLA-DRB1*, *-DQA1* and *-DQB1*alleles in patients with T1D in the São Luís, Maranhão State, Brazil.**

| **HLA allele** | **n** | **%** |
| --- | --- | --- |
| ***DRB1**** |  |  |
| *01* | 22 | 7.24% |
| ***03*** | **91** | **29.93%** |
| ***03:01*** | **90** | **29.61%** |
| ***04*** | **92** | **30.26%** |
| *04:01* | 21 | 6.91% |
| *04:04* | 18 | 5.92% |
| ***04:05*** | **28** | **9.21%** |
| ***07:01*** | **31** | **10.20%** |
| ***DQA1**** |  |  |
| *01:01* | 27 | 8.94% |
| *01:02* | 19 | 6.29% |
| ***03:01*** | **81** | **26.82%** |
| *03:02* | 21 | 6.95% |
| ***05:01*** | **88** | **29.14%** |
| *05:05* | 18 | 5.96% |
| ***DQB1**** |  |  |
| ***02:01*** | **80** | **26.32%** |
| ***02:02*** | **36** | **11.84%** |
| *03:01* | 19 | 6.25% |
| ***03:02*** | **99** | **32.57%** |
| *05:01* | 29 | 9.54% |
| Bold indicates the most prevalent HLA alleles. T1D = type 1 diabetes. | | |

**Table 3S. *HLA-DRB1/DRB1* genotypes distribution in patients with T1D in the São Luís, Maranhão State, Brazil (> 1% of frequency).**

| ***HLA-DRB1/DRB1 genotype*** | **n** | **%** |
| --- | --- | --- |
| *DRB1*01/DRB1*10* | 2 | 1.32% |
| *DRB1*01/DRB1*13* | 2 | 1.32% |
| *DRB1*01/DRB1*03* | 5 | 3.29% |
| *DRB1*01/DRB1*04* | 6 | 3.95% |
| ***DRB1*03/DRB1*03*** | **13** | **8.55%** |
| ***DRB1*03/DRB1*04*** | **40** | **26.32%** |
| ***DRB1*03/DRB1*07*** | **8** | **5.27%** |
| *DRB1*03/DRB1*09* | 2 | 1.32% |
| *DRB1*03/DRB1*11* | 2 | 1.32% |
| *DRB1*03/DRB1*13* | 4 | 2.63% |
| *DRB1*03/DRB1*16* | 2 | 1.32% |
| ***DRB1*04/DRB1*04*** | **9** | **5.92%** |
| ***DRB1*04/DRB1*07*** | **9** | **5.92%** |
| *DRB1*04/DRB1*08* | 7 | 4.61% |
| *DRB1*04/DRB1*09* | 3 | 1.97% |
| *DRB1*04/DRB1*10* | 2 | 1.32% |
| *DRB1*04/DRB1*11* | 2 | 1.32% |
| *DRB1*04/DRB1*13* | 4 | 2.63% |
| *DRB1*07/DRB1*07* | 2 | 1.32% |
| *DRB1*07/DRB1*13* | 2 | 1.32% |
| *DRB1*07/DRB1*15* | 2 | 1.32% |
| Bold indicates the most prevalent HLA-DRB1 genotypes. T1D = type 1 diabetes. | | |

**Table 4S. Frequencies of HLA genotypes in patients with T1D in the São Luís, Maranhão State, Brazil (> 1% of frequency).**

| **Genotype**  ***DRB1~DQA1~DQB1 DRB1~DQA1~DQB1*** | **n** | **%** |
| --- | --- | --- |
| *01:01~01:01~02:01 03:01~05:01~05:01* | 2 | 1.32% |
| *01:01~01:01~03:02 04:05~03:01~05:01* | 3 | 1.97% |
| *01:02~01:01~02:01 03:01~05:01~05:01* | 3 | 1.97% |
| *01:02~01:01~05:01 10:01~01:01~05:01* | 2 | 1.32% |
| ***03:01~02:01~02:01 07:01~05:01~02:02*** | **8** | **5.26%** |
| *03:01~03:01~02:01 04:01~05:01~03:02* | 6 | 3.95% |
| ***03:01~03:01~02:01 04:02~05:01~03:02*** | **7** | **4.61%** |
| ***03:01~03:01~02:01 04:04~05:01~03:02*** | **7** | **4.61%** |
| *03:01~03:01~03:02 04:04~05:01~03:02* | 3 | 1.97% |
| ***03:01~03:02~02:01 04:05~05:01~03:02*** | **9** | **5.92%** |
| *03:01~03:02~03:02 04:05~05:01~03:02* | 2 | 1.32% |
| ***03:01~05:01~02:01 03:01~05:01~02:01*** | **11** | **7.24%** |
| *04:01~03:01~03:02 04:05~03:01~03:02* | 3 | 1.97% |
| *04:01~03:01~03:02 08:07~04:01~04:02* | 3 | 1.97% |
| *04:04~02:01~02:02 07:01~03:01~03:02* | 2 | 1.32% |
| *04:05~02:01~02:02 07:01~03:01~03:02* | 3 | 1.97% |
| *04:07~01:01~03:02 10:01~03:01~05:01* | 2 | 1.32% |
| *07:01~01:02~02:02 15:03~02:01~06:02* | 2 | 1.32% |
| *07:01~02:01~02:02 09:01~03:01~02:02* | 2 | 1.32% |
| Bold indicates the most prevalent categories. | | |

**Figure 3S. Distribution of the *HLA-*DR*B1* (a) and *HLA-DQA1* (b)alleles in patients with T1D in the São Luís, Maranhão State according to self-reported color/race.**

**Table 5S. Allelic frequency distribution of the *HLA-DRB1* in individuals with type 1 diabetes and control/BMD.**

| **HLA alleles** | **T1D** | **Control/REDOME** | **OR [95% CI]** | ***P* value** |
| --- | --- | --- | --- | --- |
| **n (%)** | **n (%)** |
| ***DRB1**** |  |  |  |  |
| *01* | 22 (7.24) | 117 (9.44) | 0.74 [0.46–1.20] | 0.230 |
| *03* | **91 (29.93)** | 94 (7.58) | **5.20 [3.77–7.19]** | **<0.001*** |
| *04* | **92 (30.26)** | **165 (13.31)** | **2.82 [2.10–3.79]** | **<0.001*** |
| *07* | 31 (10.2) | **167 (13.47)** | 0.72 [0.48–1.09] | 0.126 |
| *08* | 13 (4.28) | 98 (7.90) | **0.52 [0.28–0.94]** | **0.028*** |
| *09* | 8 (2.63) | 32 (2.58) | 1.02 [0.46–2.23] | 1.000 |
| *10* | 4 (1.32) | 27 (2.18) | 0.59 [0.20–1.72] | 0.337 |
| *11* | 9 (2.96) | 132 (10.65) | **0.25 [0.12–0.50]** | **<0.001*** |
| *12* | 1 (0.33) | 8 (0.65) | 0.50 [0.06–4.07] | 1.000 |
| *13* | 14 (4.61) | **173 (13.95)** | **0.29 [0.17–0.52]** | **<0.001*** |
| *14* | 2 (0.66) | 56 (4.52) | **0.14 [0.03–0.57]** | **0.001*** |
| *15* | 5 (1.64) | 101 (8.15) | **0.18 [0.07–0.46]** | **<0.001*** |
| *16* | 12 (3.95) | 70 (5.65) | 0.68 [0.36–1.28] | 0.236 |
| ***DQA1**** |  |  |  |  |
| *01:01* | 27 (8.94) | 169 (13.63) | **0.61 [0.40-0.94]** | **0.024*** |
| *01:02* | 19 (6.29) | **188 (15.16)** | **0.37 [0.22-0.60]** | **<0.001*** |
| *01:03* | 5 (1.66) | 82 (6.61) | **0.23 [0.09-0.58]** | **<0.001*** |
| ***02:01*** | **30 (9.93)** | 169 (13.63) | 0.69 [0.46-1.04] | 0.079 |
| ***03:01*** | **81 (26.82)** | **209 (16.85)** | **1.79 [1.33-2.40]** | **<0.001*** |
| *03:02* | 21 (6.95) | 0 (0) | - | **<0.001*** |
| *04:01* | 10 (3.31) | 98 (7.90) | **0.39 [0.20-0.76]** | **0.004*** |
| *04:02* | 0 (0) | 1 (0.08) | - | 1.000 |
| ***05:01*** | **88 (29.14)** | **322 (25.97)** | 1.16 [0.87-1.53] | 0.292 |
| *05:03* | 2 (0.66) | 0 (0) | - | **0.038*** |
| *05:05* | 18 (5.96) | 0 (0) | - | **<0.001*** |
| *05:10* | 0 (0) | 1 (0.8) | - | 1.000 |
| *06:01* | 1 (0.33) | 1 (0.8) | 4.08 [0.25-65.65] | 0.355 |
| ***DQB1**** |  | |  |  |
| ***02:01*** | **80 (26.32)** | 83 (6.69) | 4.97 [3.54-6.98] | **<0.001*** |
| ***02:02*** | **36 (11.84)** | **157 (12.66)** | 0.92 [0.62-1.36] | 0.698 |
| *03:01* | 19 (6.25) | **255 (20.56)** | 0.25 [0.15-0.41] | **<0.001*** |
| ***03:02*** | **99 (32.57)** | 134 (10.81) | 3.98 [2.95-5.37] | **<0.001*** |
| *03:03* | 5 (1.64) | 57 (4.60) | 0.34 [0.13-0.87] | **0.018*** |
| *03:04* | 0 (0) | 2 (0.16) | - | 1.000 |
| *03:19* | 3 (0.99) | 0 (0) | - | **0.007*** |
| *04:01* | 0 (0) | 1 (0.08) | - | 1.000 |
| *04:02* | 12 (3.95) | 112 (9.03) | 0.41 [0.22-0.76] | **0.003*** |
| *05:01* | 29 (9.54) | **161 (12.98)** | 0.70 [0.46-1.07] | **0.001*** |
| *05:02* | 3 (0.99) | 17 (1.37) | 0.71 [0.20-2.46] | 0.780 |
| *05:03* | 0 (0) | 21 (1.69) | - | **0.022*** |
| *06:01* | 0 (0) | 4 (0.32) | - | 1.000 |
| *06:02* | 6 (1.97) | 109 (8.79) | 0.20 [0.09-0.47] | **<0.001*** |
| *06:03* | 5 (1.64) | 78 (6.29) | 0.24 [0.10-0.62] | **0.001*** |
| *06:04* | 6 (1.97) | 29 (2.34) | 0.84 [0.34-2.04] | 0.698 |
| *06:09* | 1 (0.33) | 17 (1.37) | 0.23 [0.03-1.79] | 0.227 |
| *06:11* | 0 (0) | 2 (0.16) | - | 1.000 |
| *06:38* | 0 (0) | 1 (0.08) | - | 1.000 |
| OR = Odds ratio. 95% CI = 95% confidence interval. * Statistically significant difference (P < .05). Control/REDOME = Samples from REDOME database. | | | | |

**Table 6S. Allelic frequency distribution of the HLA-*DRB1*, *-DQA1* and *-DQB1* in individuals with T1D according to Y chromosome ancestry.**

| **HLA Alleles** | **Y chromosome ancestry** | | | ***P* value** | | |
| --- | --- | --- | --- | --- | --- | --- |
| **EUR**  **(n = 134)** | **AFR**  **(n = 14)** | **NAM**  **(n = 10)** | **EUR *versus* AFR** | **EUR *versus* NAM** | **AFR *versus* NAM** |
| **n (%)** | **n (%)** | **n (%)** |
| ***DRB1**** |  |  |  | 0.785 | <0.001* | 0.525 |
| *01* | 6 (4.5) | 2 (14.4) | 3 (30.0) |  |  |  |
| *03* | 36 (26.9) | 4 (28.6) | 2 (20.0) |  |  |  |
| *04* | 47 (35.1) | 4 (28.6) | 1 (10.0) |  |  |  |
| *07* | 14 (10.4) | 1 (7.1) | 0 (0) |  |  |  |
| *08* | 9 (6.7) | 0 (0) | 0 (0) |  |  |  |
| *13* | 7 (5.2) | 1 (7.1) | 0 (0) |  |  |  |
| *16* | 5 (3.7) | 1 (7.1) | 3 (30.0) |  |  |  |
| Other | 10 (7.5) | 1 (7.1) | 1 (10.0) |  |  |  |
| ***DQA1**** |  |  |  | 0.277 | 0.108 | 0.499 |
| *01:01* | 8 (6.1) | 2 (14.3) | 3 (30.0) |  |  |  |
| *01:02* | 10 (7.6) | 1 (7.1) | 2 (20.0) |  |  |  |
| *01:03* | 3 (2.3) | 0 (0) | 0 (0) |  |  |  |
| *02:01* | 12 (9.1) | 1 (7.1) | 0 (0) |  |  |  |
| *03:01* | 42 (31.8) | 2 (14.3) | 1 (10.0) |  |  |  |
| *03:02* | 5 (3.8) | 3 (21.4) | 0 (0) |  |  |  |
| *04:01* | 6 (4.5) | 0 (0) | 0 (0) |  |  |  |
| *05:01* | 35 (26.5) | 4 (28.6) | 2 (20.0) |  |  |  |
| *05:03* | 2 (1.5) | 0 (0) | 0 (0.0) |  |  |  |
| *05:05* | 9 (6.8) | 1 (7.1) | 2 (20.0) |  |  |  |
| ***DQB1**** |  |  |  | 0.963 | 0.086 | 0.374 |
| *02:01* | 31 (23.1) | 4 (28.6) | 2 (20.0) |  |  |  |
| *02:02* | 12 (9.0) | 2 (14.3) | 0 (0) |  |  |  |
| *03:01* | 12 (9.0) | 1 (7.1) | 2 (20.0) |  |  |  |
| *03:02* | 49 (36.6) | 4 (28.6) | 1 (10.0) |  |  |  |
| *03:03* | 1 (0.7) | 0 (0) | 0 (0) |  |  |  |
| *03:19* | 2 (1.5) | 0 (0) | 0 (0) |  |  |  |
| *04:02* | 7 (5.2) | 0 (0) | 0 (0) |  |  |  |
| *05:01* | 9 (6.7) | 2 (14.3) | 3 (30.0) |  |  |  |
| *05:02* | 2 (1.5) | 0 (0) | 1 (10.0) |  |  |  |
| *06:02* | 3 (2.2) | 0 (0) | 0 (0) |  |  |  |
| *06:03* | 2 (1.5) | 0 (0) | 1 (10.0) |  |  |  |
| *06:04* | 4 (3.0) | 1 (7.1) | 0 (0) |  |  |  |
| EUR = European Y chromosome. AFR = African Y chromosome. NAM = Native American Y chromosome. Other = *DRB1* 09, 10, 11, 14, 15*. * Statistically significant difference (*P* < 0.05). | | | | | | |

**Table 7S. Distribution of the *DRB1** alleles in individuals with T1D according to Y chromosome haplogroup.**

| **HLA** | **Y chromosome haplogroup** | | | | | | | | | | | | | |
| --- | --- | --- | --- | --- | --- | --- | --- | --- | --- | --- | --- | --- | --- | --- |
| **E1b1a** | | **E1b1b** | | **G2a** | | **I2a** | | **Q** | | **R1b** | | **Other** | |
| **n** | **%** | **n** | **%** | **n** | **%** | **n** | **%** | **n** | **%** | **n** | **%** | **n** | **%** |
| *DRB1*01* | 2 | 18.2 | 0 | 0 | 0 | 0 | 1 | 9.1 | **3** | **27.3** | 2 | 18.2 | **3** | **27.3** |
| *DRB1*03* | 4 | 9.5 | **10** | **23.8** | 4 | 9.5 | 6 | 14.3 | 2 | 4.8 | **10** | **23.8** | 6 | 14.3 |
| *DRB1*04* | 3 | 5.8 | 9 | 17.3 | 3 | 5.8 | 1 | 1.9 | 1 | 1.9 | **26** | **50.0** | 9 | 17.3 |
| *DRB1*07* | 1 | 6.7 | 2 | 13.3 | 1 | 6.7 | 1 | 6.7 | 0 | 0 | **9** | **60.0** | 1 | 6.7 |
| *DRB1*08* | 0 | 0 | 1 | 11.1 | 1 | 11.1 | 1 | 11.1 | 0 | 0 | **3** | **33.3** | **3** | **33.3** |
| *DRB1*09* | 0 | 0 | 0 | 0 | 0 | 0 | 0 | 0 | 0 | 0 | 0 | 0 | **1** | **100** |
| *DRB1*10* | 0 | 0 | **1** | **100** | 0 | 0 | 0 | 0 | 0 | 0 | 0 | 0 | 0 | 0 |
| *DRB1*11* | 0 | 0 | 1 | 16.7 | 1 | 16.7 | 0 | 0 | 1 | 16.7 | 1 | 16.7 | **2** | **33.2** |
| *DRB1*13* | 1 | 12.5 | 2 | 25.0 | 0 | 0 | 0 | 0 | 0 | 0 | **4** | **50.0** | 1 | 12.5 |
| *DRB1*14* | 0 | 0 | 0 | 0 | 0 | 0 | 0 | 0 | 0 | 0 | **2** | **100** | 0 | 0 |
| *DRB1*15* | 0 | 0 | **1** | **50.0** | 0 | 0 | 0 | 0 | 0 | 0 | **1** | **50.0** | 0 | 0 |
| *DRB1*16* | 1 | 11.1 | 1 | 11.1 | 0 | 0 | 0 | 0 | 3 | 33.3 | **4** | **44.4** | 0 | 0 |
| Other = Frequency less than 5 (T, E1a, I1, I2b, J1, J2a, J2b, N, R1a). Bold indicates Y haplogroup most frequent according to *HLA-DRB1*. Chi-square test (*P*=0.326) | | | | | | | | | | | | | | |

**
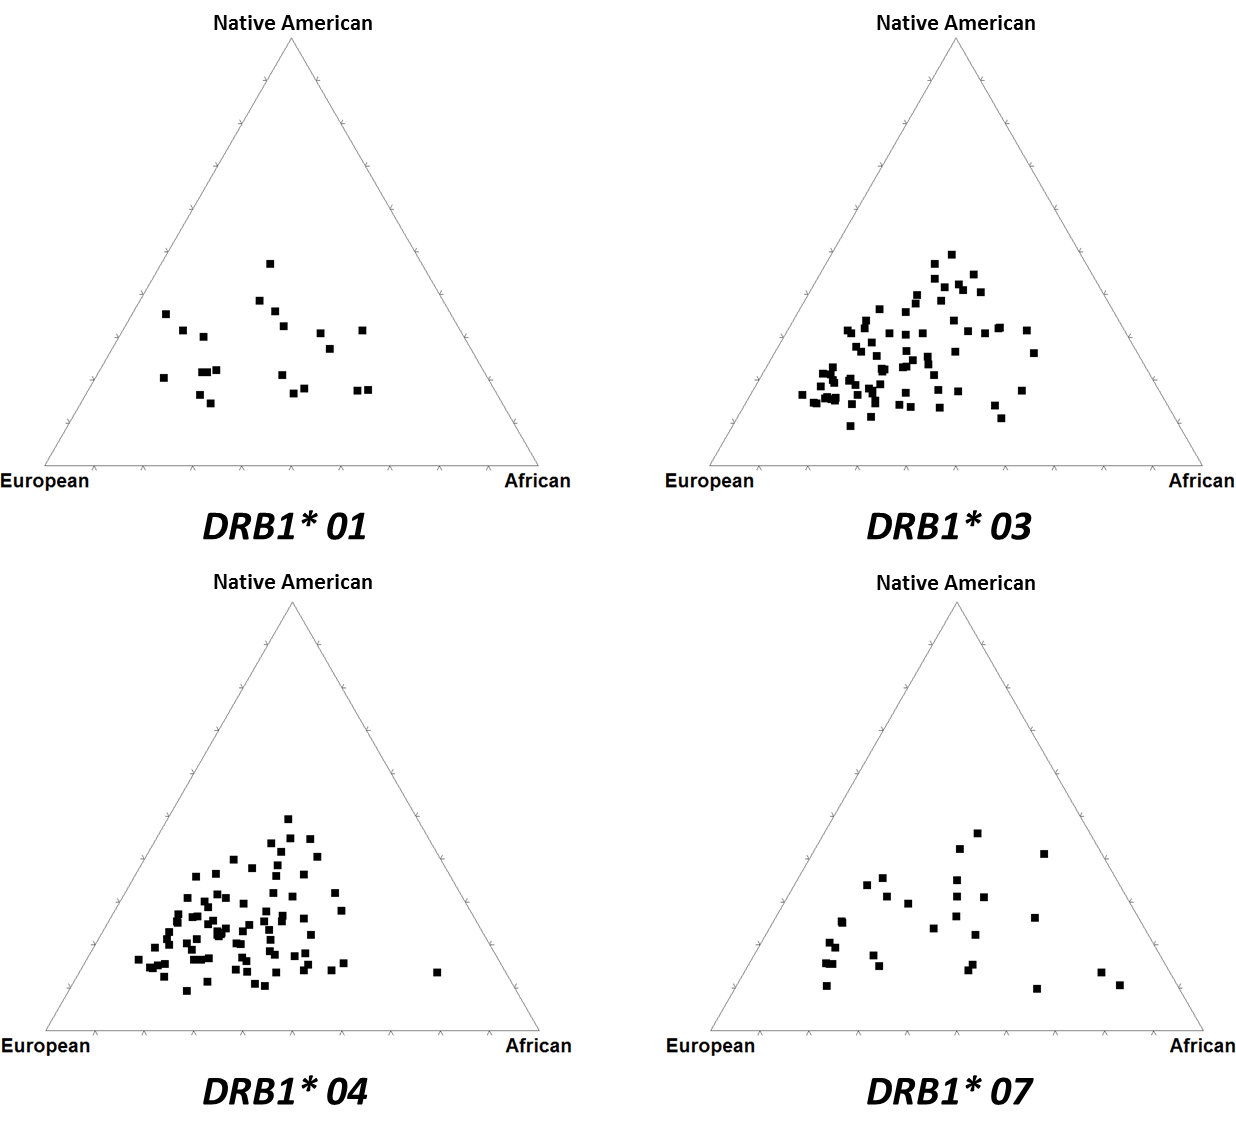
**

**Figure 4aS. Triangle plot of autosomal ancestry according to *DRB1* alelles.**

African (p = 0.078), Native American (p = 0.692), European (p = 0.215)

**
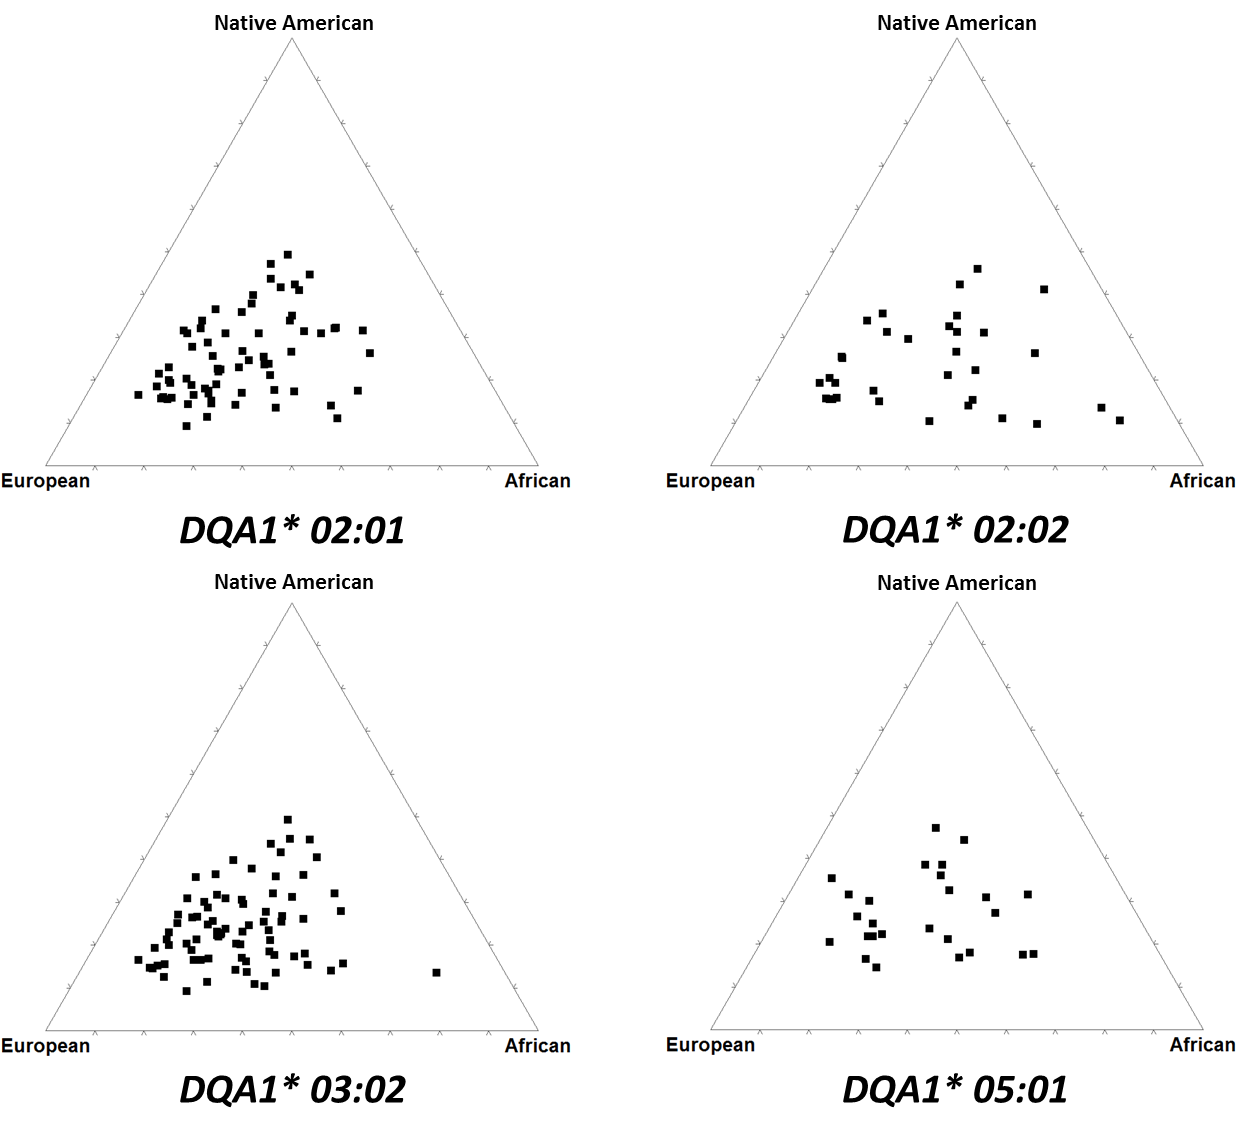
**

**Figure 4bS. Triangle plot of autosomal ancestry according to *DQA1* group.**

African (p = 0.025), Native American (p = 0.286), European (p = 0.062)

**
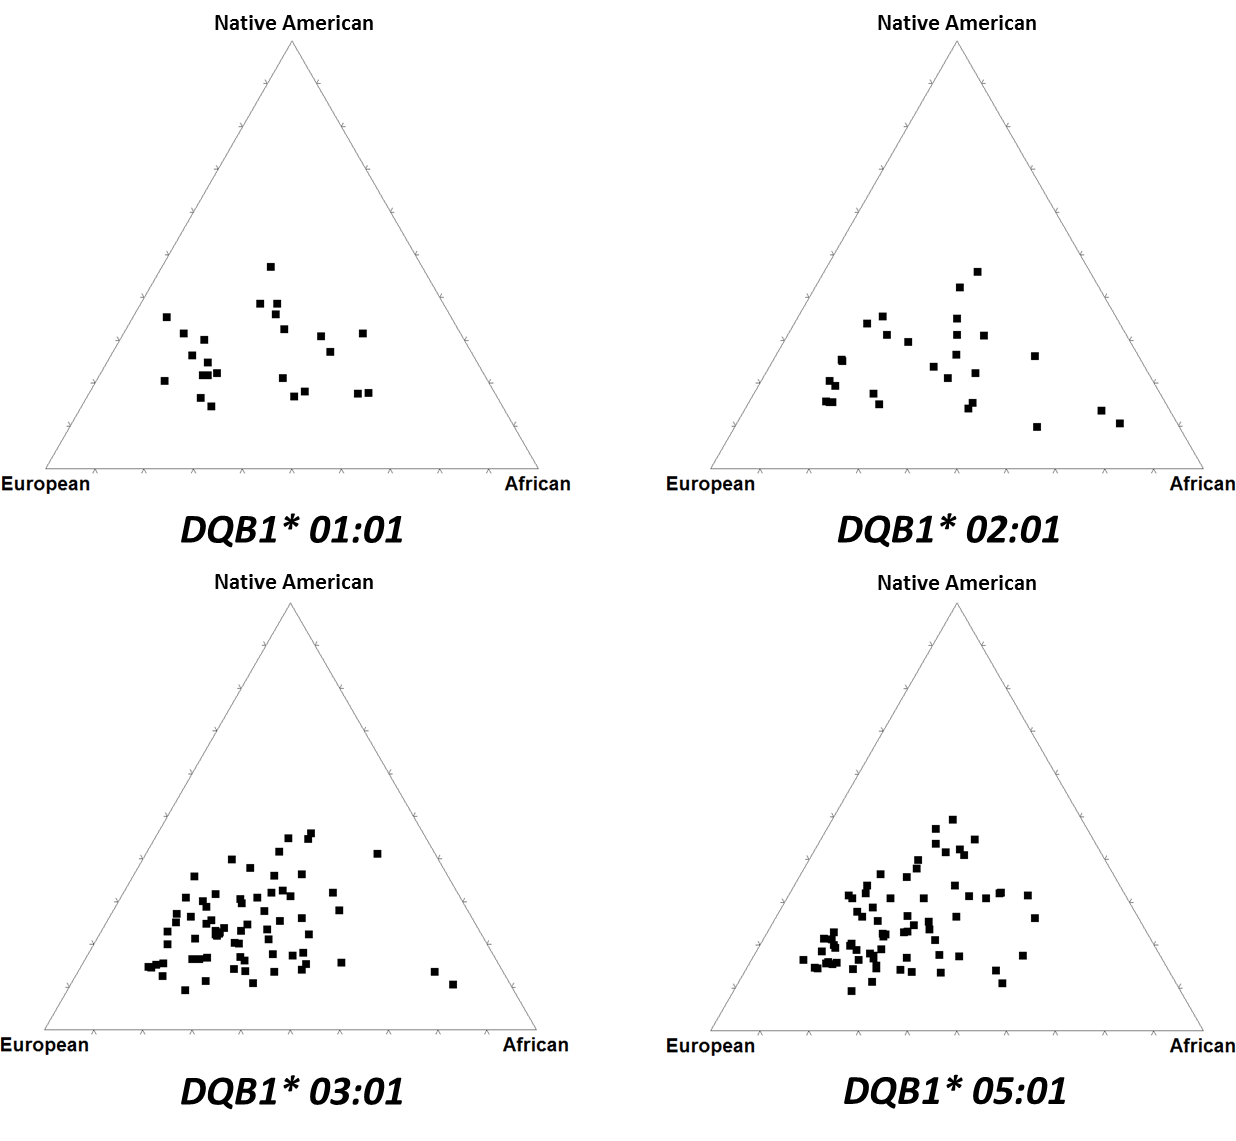
**

**Figure 4cS. Triangle plot of autosomal ancestry according to *DQB1* group.**

African (p= 0.066), Native American (p = 0.617), European (p = 0.149)
